# Supplementary material for: A highly sensitive electrochemical biosensor for microRNA122 detection based on a target-induced DNA nanostructure
Source: Royal Society of Chemistry journal article supplement (doi:10.1039/d1ay00390a), 2021-01-01
Supplement: d1ay00390a1.pdf [file d1ay00390a1.pdf]

## Supporting materials

### Highly sensitive electrochemical biosensor for microRNA122 detection based on target-induced DNA nanostructure

Ding Shen <sup>a,1</sup>, Wei Hu <sup>b,1</sup>, Qiyi He <sup>a</sup>, Huiyi Yang <sup>a</sup>, Xiping Cui <sup>a,\*</sup>, Suqing Zhao <sup>a,\*</sup>

<sup>a</sup> Department of Pharmaceutical Engineering, School of Biomedical and Pharmaceutical Sciences, Guangdong University of Technology, Guangzhou, 510006, China.

<sup>b</sup> The People's Hospital of China Three Gorges University • The First People's Hospital of Yichang, Hubei, 443000, China.

<sup>1</sup> Both authors have contributed equally.

\*Corresponding author:

Dr. Xiping Cui

E-mail address: [cuxiping1989@163.com](mailto:cuxiping1989@163.com)

Prof. Suqing Zhao

E-mail address: [sqzhao@gdut.edu.cn](mailto:sqzhao@gdut.edu.cn)

E-mail address for other authors:

[shending92@163.com](mailto:shending92@163.com) (D. Shen);

[weihu20160322@ctgu.edu.cn](mailto:weihu20160322@ctgu.edu.cn) (W. Hu);

[chesto36@163.com](mailto:chesto36@163.com) (Q.-Y. He);

[iyihgnay@163.com](mailto:iyihgnay@163.com) (H.-Y. Yang)

36 **Table S1.** DNA and microRNA sequences employed in this work.

| Name                    | Sequence ( 5'– 3')                                                                                                      |
|-------------------------|-------------------------------------------------------------------------------------------------------------------------|
| S1                      | SH-<br>TATCACCAGGCAGTTGACAGTGTAGCAAGCTGTAATA<br>GATGCGAGGGTCCAATAC                                                      |
| S2                      | SH-<br>TCAACTGCCTGGTGATAAAACGACACTACGTGGGAAT<br>CTACTATGGCGGCTCTTC                                                      |
| S3                      | SH-<br>TTCAGACTTAGGAATGTGCTTCCCACGTAGTGTCGTTT                                                                           |
| S4                      | GTATTGGACCCTCGCAT<br>ACATTCCTAAGTCTGAAACATTACAGCTTGCTACACGA<br>GAAGAGCCGCCATAGTATTTTTTTTTTACGTTGCACTG<br>CCTTGATGGACTAT |
| helper                  | GCAATTTGGAGTGTGACAATGGTCAAACACCATTGTC<br>ACACTCCATTTTTTATAGTCCATCAAGGCAGTGTGCAA<br>CGT                                  |
| miRNA                   | UGGAGUGUGACAAUGGUGUUUG                                                                                                  |
| H1                      | biotin-<br>ACCATTGTCACACTCCAAATTGCTGGAGTGTGACAATG<br>GTGTTTGA                                                           |
| H2                      | GCAATTTGGAGTGTGACAATGGTTCAAACACCATTGTC<br>ACACTCCA-biotin                                                               |
| Signal-mismatch         | UGGAGUGUGAGAAUGGUGUUUG                                                                                                  |
| Double-<br>mismatches   | UGGTGUGUGAGAAUGGUGUUUG                                                                                                  |
| Multiple-<br>mismatches | UGGTGUGUGAGAAUGGUGGUUG                                                                                                  |
| ss-DNA                  | SH-TTTTTTTTTTACGTTGCACTGCCTTGATGGACTAT                                                                                  |

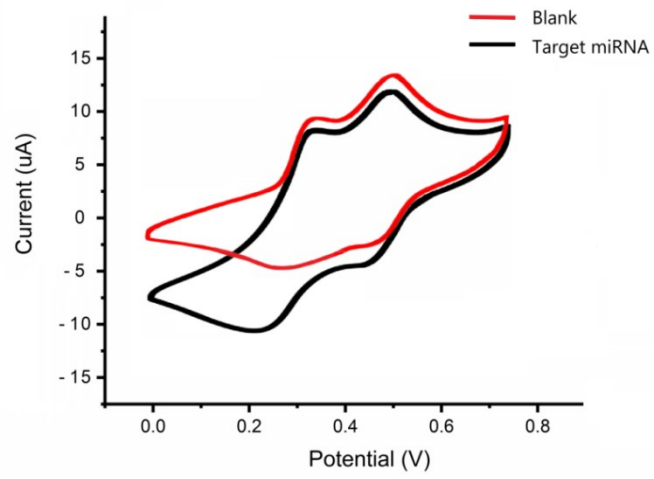

38

39 Fig S1. The cyclic voltammetry (CV) measurement for this electrochemical biosensor in the presence of 10  
40 fM of target microRNA (black line) and in the absence (red line).
